# Supplementary material for: Olive Oil Benefits from Sesame Oil Blending While Extra Virgin Olive Oil Resists Oxidation during Deep Frying
Source: MDPI journal article supplement (doi:10.3390/molecules28114290), 2023-05-24
Supplement: s1 [file s1]

**Table S1:** Total Polar Compounds during deep frying Olive oil (OO), Extra Virgin Olive Oil (EVOO) and blends with sesame oil (SO).

| Time/h | Frying Cycle | TPCs % |                   |      |      |      |                     |      |      |
|--------|--------------|--------|-------------------|------|------|------|---------------------|------|------|
|        |              | OO     | OO blends with SO |      |      | EVOO | EVOO blends with SO |      |      |
|        |              |        | 5%                | 10%  | 20%  |      | 5%                  | 10%  | 20%  |
| 0      | 1            | 5.5    | 3.5               | 3.5  | 4    | 3    | 3                   | 3    | 3.5  |
| 0.25   | 2            | 6      | 4.5               | 5    | 5.5  | 4    | 4.5                 | 4.5  | 4.5  |
| 0.5    | 3            | 6.5    | 5                 | 5.5  | 6    | 4.5  | 4.5                 | 5    | 5    |
| 0.75   | 4            | 7      | 5                 | 6    | 6    | 4.5  | 5                   | 5    | 5    |
| 1      | 5            | 7      | 5                 | 6    | 6.5  | 4.5  | 5.5                 | 5.5  | 5.5  |
| 1.25   | 6            | 6.5    | 5.5               | 6    | 6.5  | 4.5  | 5.5                 | 5.5  | 5.5  |
| 1.5    | 7            | 7      | 5.5               | 6    | 6.5  | 5    | 5.5                 | 5.5  | 5.5  |
| 1.75   | 8            | 7.5    | 5.5               | 6    | 6.5  | 5    | 5.5                 | 5.5  | 5.5  |
| 2      | 9            | 7.5    | 5.5               | 6    | 6.5  | 5    | 6                   | 5.5  | 5.5  |
| 2.25   | 10           | 8      | 6                 | 6    | 6.5  | 5    | 6                   | 5.5  | 5.5  |
| 2.5    | 11           | 8      | 6                 | 6    | 6.5  | 5.5  | 6                   | 5.5  | 5.5  |
| 2.75   | 12           | 8      | 6                 | 6    | 6.5  | 5.5  | 6                   | 5.5  | 5.5  |
| 3      | 13           | 8.5    | 6                 | 6    | 6.5  | 5.5  | 6.5                 | 5.5  | 5.5  |
| 3.25   | 14           | 8.5    | 6.5               | 6.5  | 6.5  | 5.5  | 6.5                 | 6    | 5.5  |
| 3.5    | 15           | 8.5    | 6.5               | 6.5  | 6.5  | 6    | 6.5                 | 6    | 5.5  |
| 3.75   | 16           | 9      | 6.5               | 6.5  | 6.5  | 6    | 7                   | 6.5  | 5.5  |
| 4      | 17           | 9      | 7                 | 7    | 7    | 6    | 7                   | 6.5  | 6    |
| 4.25   | 18           | 9      | 7                 | 7    | 7    | 6.5  | 7                   | 6.5  | 6    |
| 4.5    | 19           | 9.5    | 7                 | 7    | 7.5  | 6.5  | 7.5                 | 7    | 6    |
| 4.75   | 20           | 9.5    | 7                 | 7.5  | 7.5  | 7    | 7.5                 | 7    | 6.5  |
| 5      | 21           | 9.5    | 7                 | 7.5  | 7.5  | 7    | 7.5                 | 7    | 6.5  |
| 5.25   | 22           | 10     | 7                 | 7.5  | 8    | 7    | 8                   | 7.5  | 7    |
| 5.5    | 23           | 10     | 7.5               | 8    | 8    | 7.5  | 8                   | 7.5  | 7    |
| 5.75   | 24           | 10     | 7.5               | 8    | 8.5  | 7.5  | 8                   | 7.5  | 7    |
| 6      | 25           | 10.5   | 8                 | 8    | 8.5  | 7.5  | 8.5                 | 8    | 7.5  |
| 6.25   | 26           | 11     | 8                 | 8.5  | 9    | 8    | 8.5                 | 8    | 7.5  |
| 6.5    | 27           | 11     | 8                 | 8.5  | 9    | 8    | 8.5                 | 8.5  | 8    |
| 6.75   | 28           | 11     | 8.5               | 8.5  | 9    | 8.5  | 9                   | 8.5  | 8    |
| 7      | 29           | 11.5   | 8.5               | 8.5  | 9.5  | 8.5  | 9                   | 8.5  | 8.5  |
| 7.25   | 30           | 11.5   | 9                 | 9    | 9.5  | 9    | 9                   | 9    | 8.5  |
| 7.5    | 31           | 11.5   | 9                 | 9    | 9.5  | 9    | 9.5                 | 9    | 8.5  |
| 7.75   | 32           | 12     | 9                 | 9    | 10   | 9    | 9.5                 | 9    | 9    |
| 8      | 33           | 12.5   | 9.5               | 9.5  | 10   | 9.5  | 9.5                 | 9.5  | 9    |
| 8.25   | 34           | 12.5   | 9.5               | 9.5  | 10.5 | 9.5  | 10                  | 9.5  | 9    |
| 8.5    | 35           | 13     | 10                | 10   | 11   | 9.5  | 10                  | 9.5  | 9.5  |
| 8.75   | 36           | 13     | 10                | 10   | 11   | 10   | 10                  | 10   | 9.5  |
| 9      | 37           | 13     | 10.5              | 10.5 | 11   | 10   | 10                  | 10   | 9.5  |
| 9.25   | 38           | 13     | 10.5              | 10.5 | 11.5 | 10   | 10.5                | 10   | 10   |
| 9.5    | 39           | 13.5   | 11                | 11   | 11.5 | 10.5 | 10.5                | 10.5 | 10   |
| 9.75   | 40           | 14     | 11                | 11   | 12   | 10.5 | 10.5                | 10.5 | 10   |
| 10     | 41           | 14     | 11                | 11.5 | 12   | 11   | 11                  | 11   | 10.5 |
| 10.25  | 42           | 14     | 11.5              | 11.5 | 12   | 11   | 11                  | 11   | 10.5 |

|       |    |      |      |      |      |      |      |      |      |
|-------|----|------|------|------|------|------|------|------|------|
| 10.5  | 43 | 14.5 | 11.5 | 11.5 | 12.5 | 11   | 11   | 11   | 11   |
| 10.75 | 44 | 14.5 | 12   | 12   | 12.5 | 11.5 | 11.5 | 11.5 | 11   |
| 11    | 45 | 15   | 12   | 12   | 13   | 11.5 | 11.5 | 11.5 | 11   |
| 11.25 | 46 | 15   | 12   | 12   | 13   | 11.5 | 12   | 12   | 11.5 |
| 11.5  | 47 | 15   | 12.5 | 12.5 | 13   | 12   | 12   | 12   | 11.5 |
| 11.75 | 48 | 15.5 | 13   | 12.5 | 13.5 | 12   | 12.5 | 12   | 11.5 |
| 12    | 49 | 15.5 | 13.5 | 13   | 13.5 | 12   | 12.5 | 12.5 | 11.5 |
| 12.25 | 50 | 16.5 | 13.5 | 13.5 | 14   | 12.5 | 12.5 | 12.5 | 12   |
| 12.5  | 51 | 16.5 | 14   | 14   | 14   | 13   | 13   | 13   | 12.5 |
| 12.75 | 52 | 16.5 | 14.5 | 14   | 14.5 | 13   | 13   | 13   | 12.5 |
| 13    | 53 | 17   | 15   | 14.5 | 14.5 | 13.5 | 13   | 13   | 13   |
| 13.25 | 54 | 17   | 15   | 14.5 | 15   | 14   | 13.5 | 13.5 | 13   |
| 13.5  | 55 | 18   | 15.5 | 14.5 | 15   | 14   | 13.5 | 13.5 | 13.5 |
| 13.75 | 56 | 18   | 15.5 | 14.5 | 15   | 14   | 13.5 | 13.5 | 13.5 |
| 14    | 57 | 18   | 16   | 15   | 15.5 | 14.5 | 14   | 14   | 14   |
| 14.25 | 58 | 18.5 | 16   | 15   | 15.5 | 14.5 | 14   | 14   | 14.5 |
| 14.5  | 59 | 18.5 | 16   | 15.5 | 15.5 | 14.5 | 14.5 | 14.5 | 14.5 |
| 14.75 | 60 | 18.5 | 16.5 | 16   | 16   | 15   | 14.5 | 14.5 | 14.5 |
| 15    | 61 | 18.5 | 16.5 | 16   | 16   | 15   | 14.5 | 14.5 | 15   |
| 15.25 | 62 | 19   | 17   | 16   | 16   | 15   | 15   | 15   | 15   |
| 15.5  | 63 | 19   | 17   | 16   | 16.5 | 15   | 15   | 15   | 15   |
| 15.75 | 64 | 19.5 | 17   | 16.5 | 17   | 15.5 | 15.5 | 15   | 15.5 |
| 16    | 65 | 20   | 17.5 | 16.5 | 17.5 | 15.5 | 15.5 | 15.5 | 15.5 |
| 16.25 | 66 | 20   | 17.5 | 16.5 | 17.5 | 15.5 | 15.5 | 15.5 | 16   |
| 16.5  | 67 | 20   | 18   | 17   | 17.5 | 16   | 16   | 16   | 16   |
| 16.75 | 68 | 20.5 | 18   | 17   | 18   | 16   | 16   | 16   | 16   |
| 17    | 69 | 20.5 | 18.5 | 17   | 18   | 16   | 16.5 | 16.5 | 16   |
| 17.25 | 70 | 20.5 | 19   | 17.5 | 18   | 16.5 | 16.5 | 16.5 | 16.5 |
| 17.5  | 71 | 21   | 19   | 17.5 | 18.5 | 16.5 | 16.5 | 16.5 | 16.5 |
| 17.75 | 72 | 21   | 19.5 | 18   | 18.5 | 17   | 17   | 17   | 16.5 |
| 18    | 73 | 21   | 19.5 | 18   | 19   | 17   | 17   | 17   | 17   |
| 18.25 | 74 | 21.5 | 20   | 18.5 | 19   | 17   | 17.5 | 17.5 | 17   |
| 18.5  | 75 | 21.5 | 20   | 18.5 | 19   | 17.5 | 17.5 | 17.5 | 17.5 |
| 18.75 | 76 | 22   | 20.5 | 19   | 19.5 | 18   | 17.5 | 17.5 | 17.5 |
| 19    | 77 | 22   | 20.5 | 19   | 19.5 | 18   | 18   | 18   | 18   |
| 19.25 | 78 | 22.5 | 21   | 19.5 | 20   | 18.5 | 18   | 18.5 | 18   |
| 19.5  | 79 | 22.5 | 21   | 20   | 20   | 18.5 | 18.5 | 18.5 | 18.5 |
| 19.75 | 80 | 23   | 21   | 20   | 20.5 | 19   | 18.5 | 18.5 | 18.5 |
| 20    | 81 | 23   | 21.5 | 20   | 20.5 | 19   | 19   | 19   | 19   |
| 20.25 | 82 | 23   | 21.5 | 20.5 | 21   | 19.5 | 19.5 | 19   | 19   |
| 20.5  | 83 | 23.5 | 22   | 20.5 | 21   | 19.5 | 19.5 | 19.5 | 19.5 |
| 20.75 | 84 | 24   | 22   | 20.5 | 21.5 | 20   | 19.5 | 19.5 | 20   |
| 21    | 85 | 24.5 | 22.5 | 20.5 | 21.5 | 20   | 20   | 20   | 20   |
| 21.25 | 86 | 24.5 | 22.5 | 21   | 22   | 20.5 | 20   | 20   | 20   |
| 21.5  | 87 | 25   | 22.5 | 21   | 22   | 20.5 | 20.5 | 20.5 | 20.5 |
| 21.75 | 88 |      | 23   | 21   | 22   | 21   | 20.5 | 20.5 | 20.5 |
| 22    | 89 |      | 23.5 | 21.5 | 22.5 | 21.5 | 21   | 21   | 20.5 |
| 22.25 | 90 |      | 23.5 | 21.5 | 22.5 | 21.5 | 21   | 21   | 21   |

|       |     |      |      |      |      |      |      |      |
|-------|-----|------|------|------|------|------|------|------|
| 22.5  | 91  | 24   | 22   | 23   | 22   | 21.5 | 21.5 | 21   |
| 22.75 | 92  | 24.5 | 22   | 23.5 | 22   | 21.5 | 21.5 | 21.5 |
| 23    | 93  | 25   | 22.5 | 23.5 | 22.5 | 22   | 22   | 21.5 |
| 23.25 | 94  |      | 23   | 24   | 22.5 | 22.5 | 22.5 | 22   |
| 23.5  | 95  |      | 23.5 | 24   | 23   | 22.5 | 22.5 | 22   |
| 23.75 | 96  |      | 23.5 | 24.5 | 23   | 23   | 23   | 22.5 |
| 24    | 97  |      | 24   | 25   | 23.5 | 23   | 23   | 23   |
| 24.25 | 98  |      | 24   |      | 23.5 | 23.5 | 23.5 | 23   |
| 24.5  | 99  |      | 24   |      | 24   | 23.5 | 23.5 | 23.5 |
| 24.75 | 100 |      | 24.5 |      | 24.5 | 24   | 23.5 | 23.5 |
| 25    | 101 |      | 25   |      | 24.5 | 24   | 24   | 24   |
| 25.25 | 102 |      |      |      | 25   | 24.5 | 24   | 24   |
| 25.5  | 103 |      |      |      |      | 25   | 24.5 | 24.5 |
| 25.75 | 104 |      |      |      |      |      | 25   | 24.5 |
| 26    | 105 |      |      |      |      |      |      | 25   |

**Table S2.** The retention time, standard curve, LOD and LOQ for sesame lignans.

| Sesame<br>lignans | Retention<br>time(min) | Regression line         |                                  | LOD<br>(mg/mL) | LOQ<br>(mg/mL) |
|-------------------|------------------------|-------------------------|----------------------------------|----------------|----------------|
|                   |                        | Standard curve equation | Correlation<br>(R <sup>2</sup> ) |                |                |
| sesamol           | 4,58                   | y= 0.00241x + 0.00502   | 0.994                            | 0.002          | 0.009          |
| sesamin           | 15,55                  | y=0.00281x +0.00036     | 0.9997                           | 0.005          | 0.02           |
| sesamolin         | 20,77                  | y=0.00237x +0.0098      | 0.99                             | 0.005          | 0.01           |

(a)

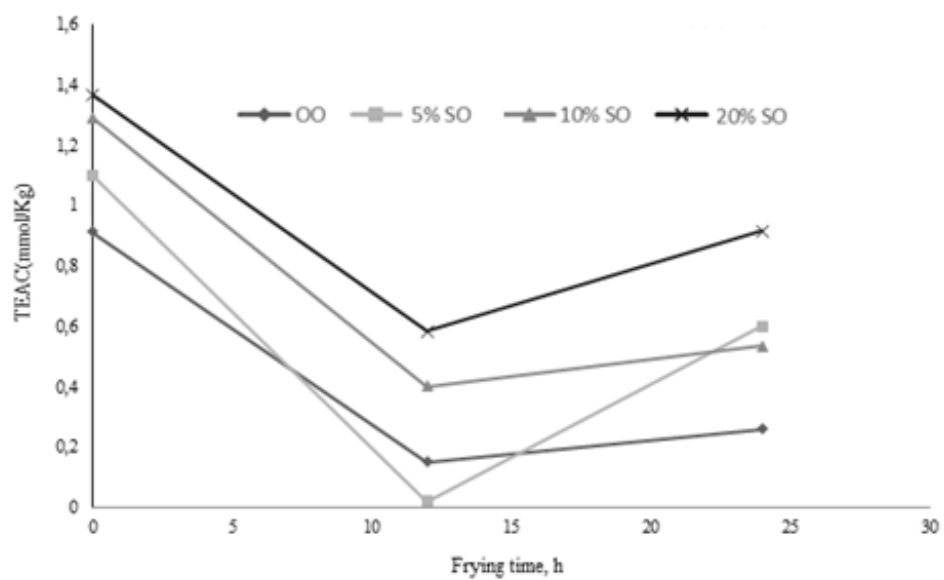

(b)

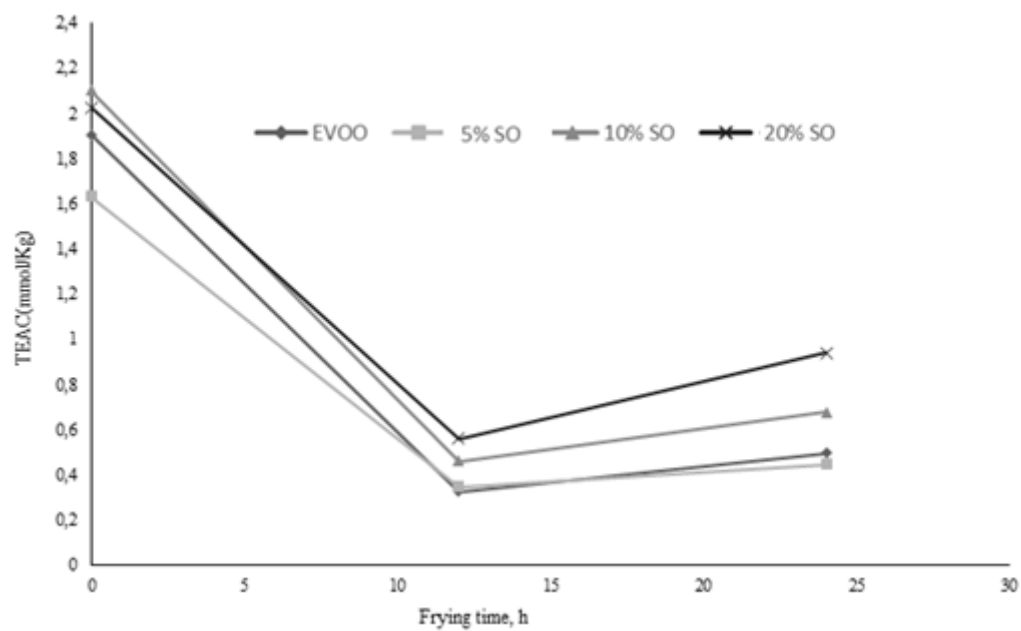

Figure S1: TEAC values (mmol/Kg) during deep frying: (a) OO, (b) EVOO blends with SO

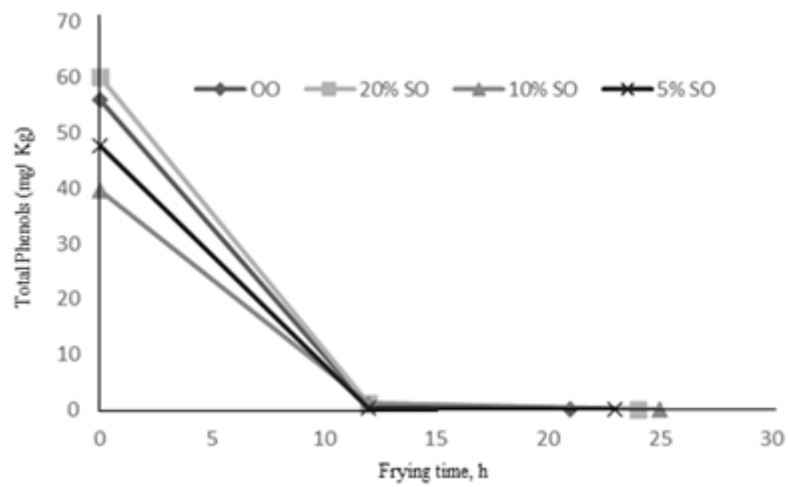

**Figure S2:** Total phenols (mg GA/Kg oil) during deep frying: OO and blends with SO

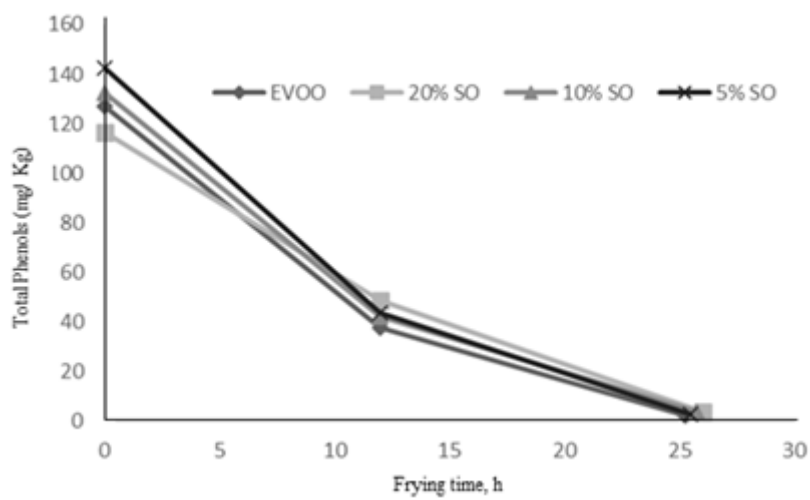

**Figure S3:** Total phenols (mg GA/Kg oil) during deep frying EVOO and blends with SO

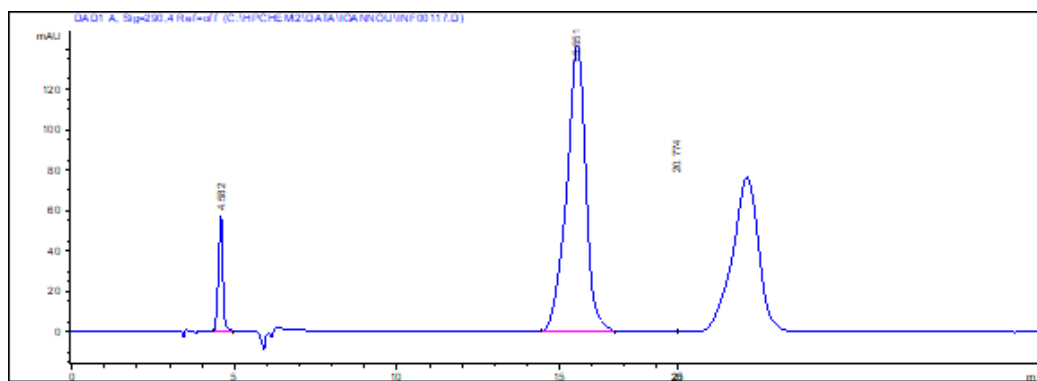

**Figure S4:** HPLC chromatogram of a mixed standard solution of sesamol, sesamin, and sesamolin.

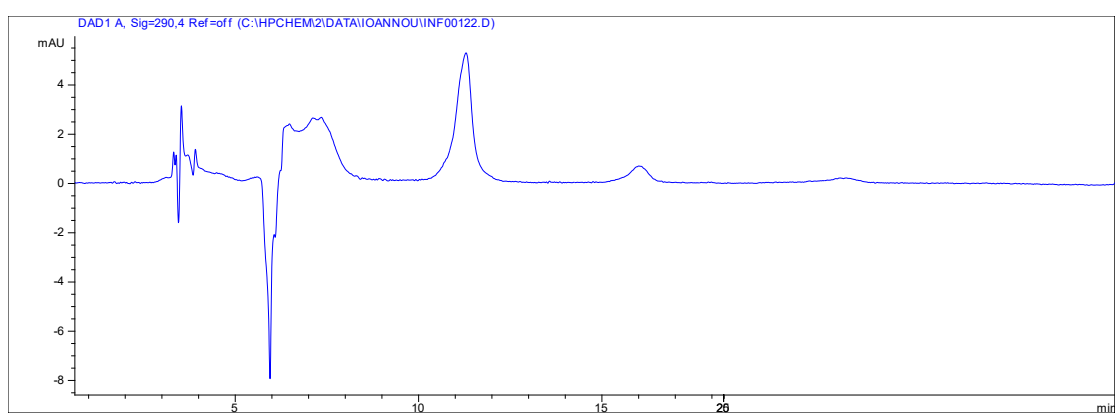

**Figure S5:** HPLC chromatogram of blend 20% v/v Sesame Oil in Olive Oil before frying.

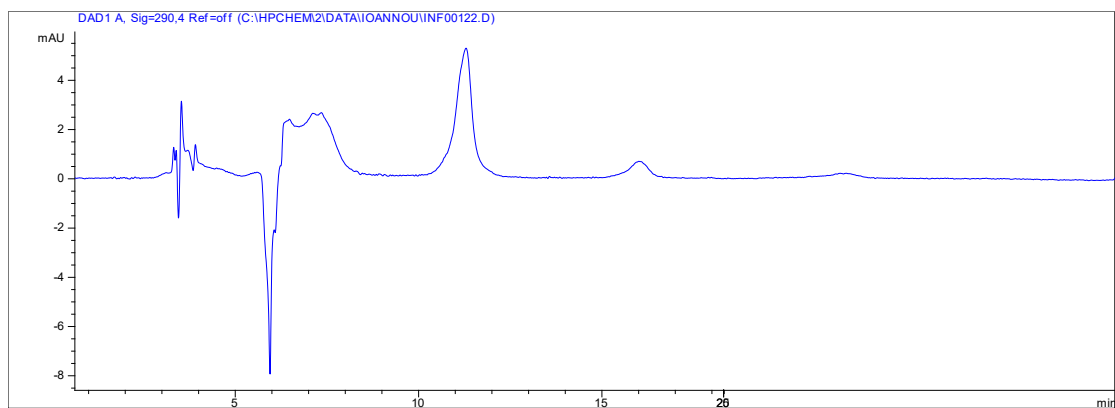

**Figure S6:** HPLC chromatogram of blend 20% v/v Sesame Oil in Olive Oil after 30 min frying.

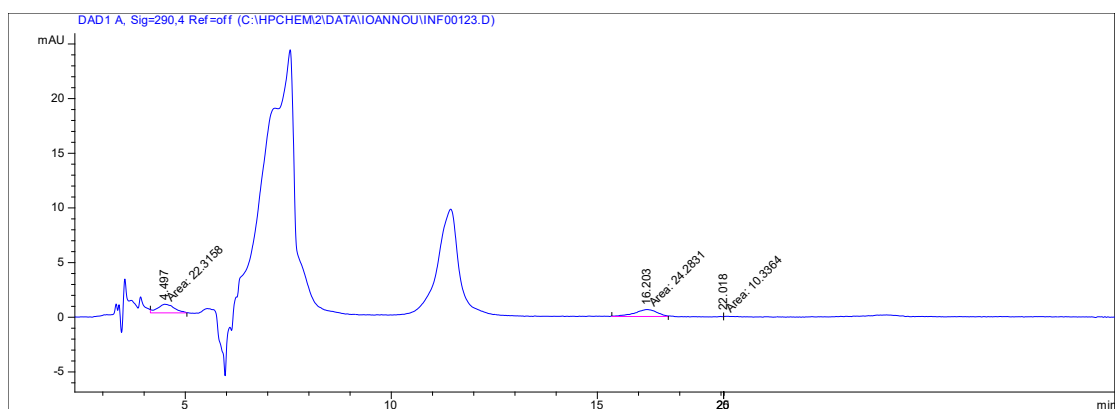

**Figure S7:** HPLC chromatogram of blend 20% v/v Sesame Oil in Olive Oil after 1h of frying.

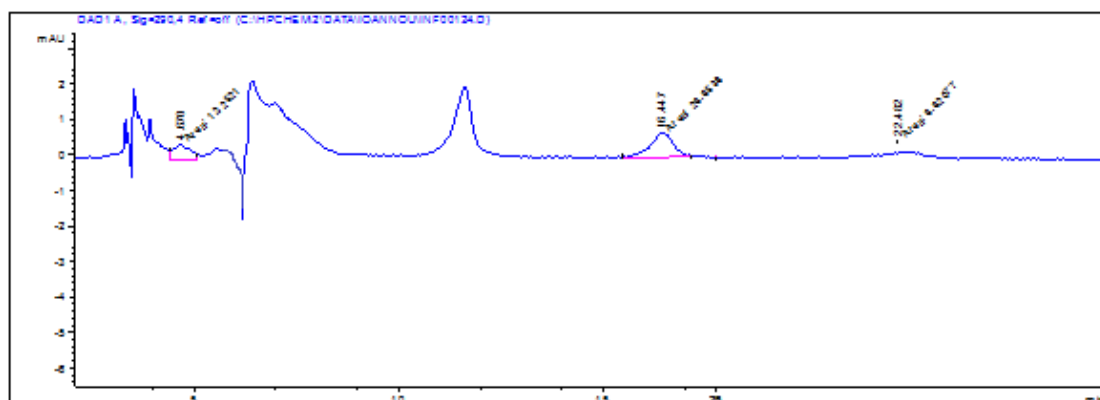

**Figure S8:** HPLC chromatogram of blend 20% v/v Sesame Oil in Olive Oil after 2h of frying.

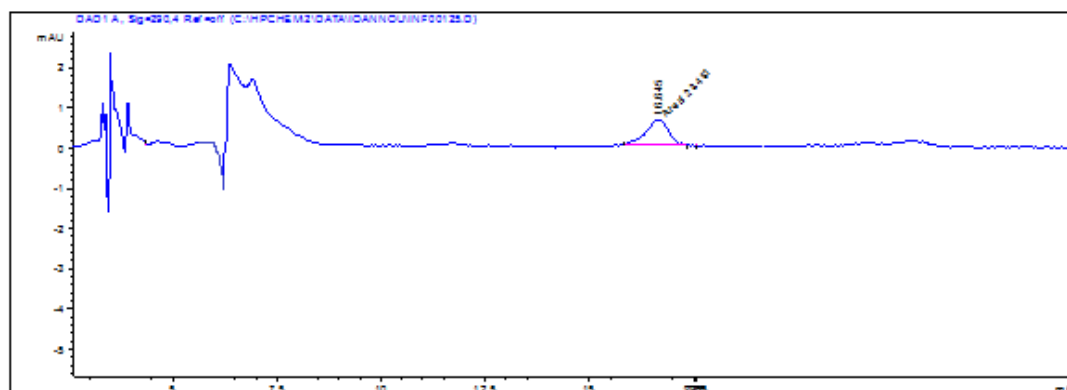

**Figure S9:** HPLC chromatogram of blend 20% v/v Sesame Oil in Olive Oil after 4h of frying.

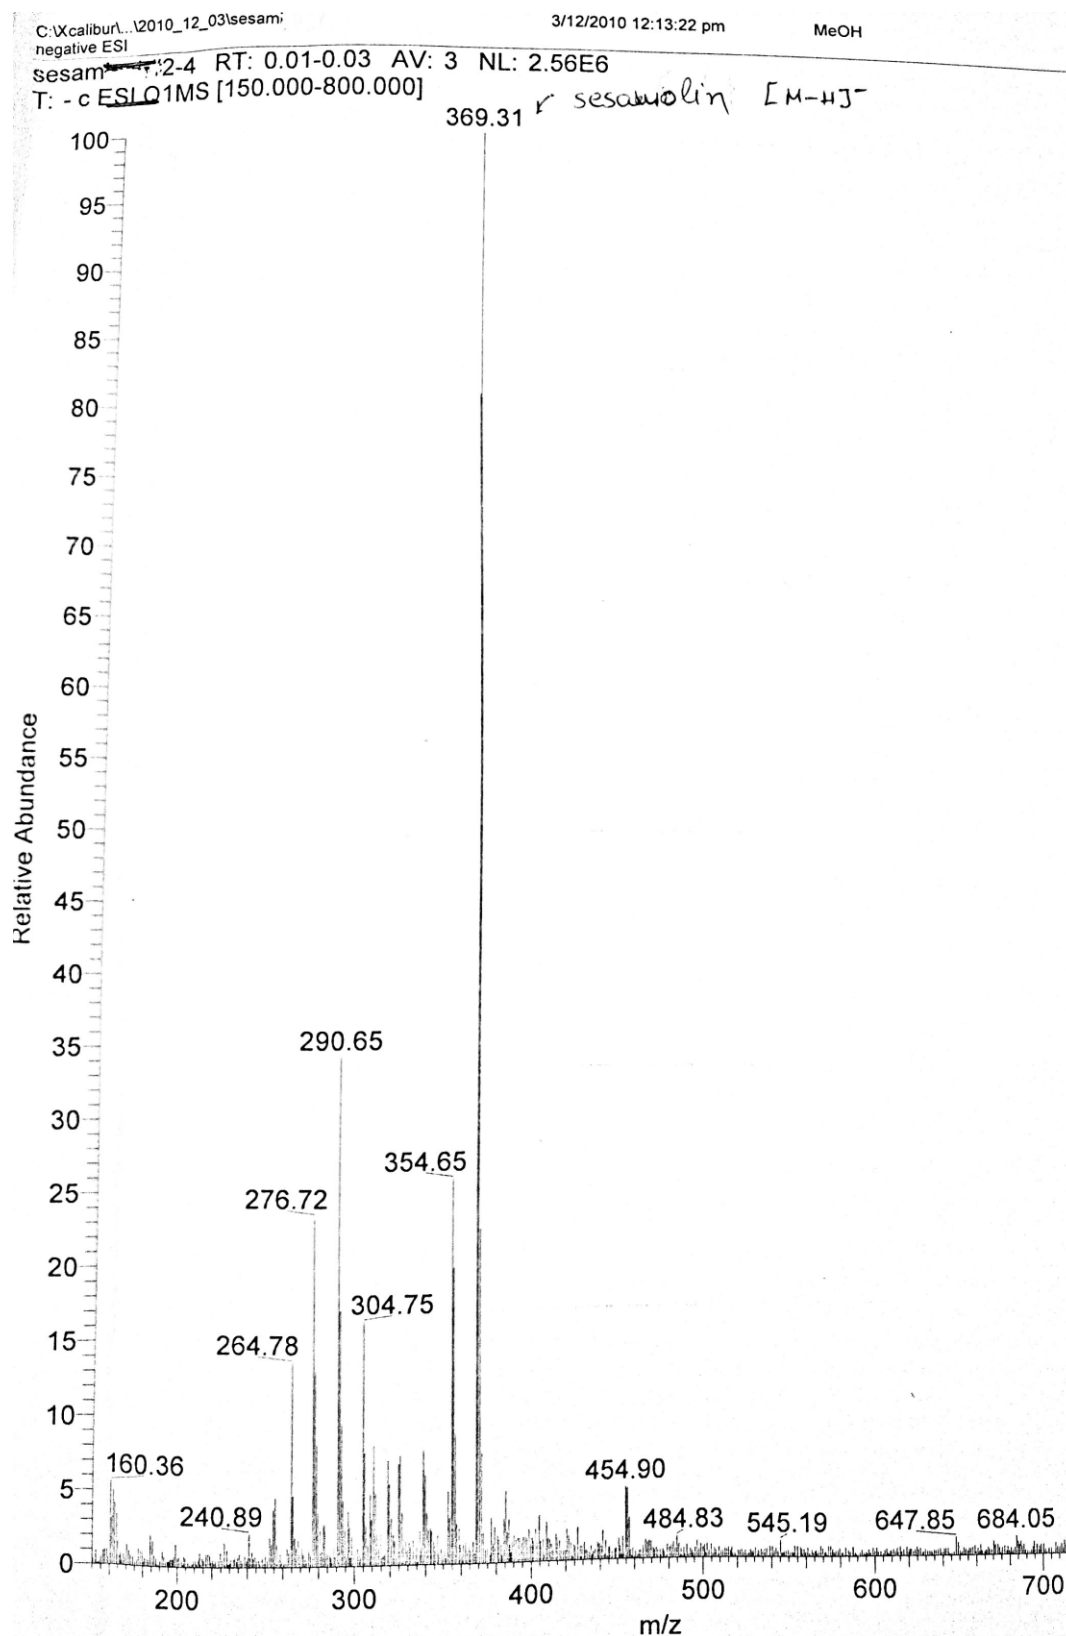

**Figure S10:** mass spectrum of Sesamol in



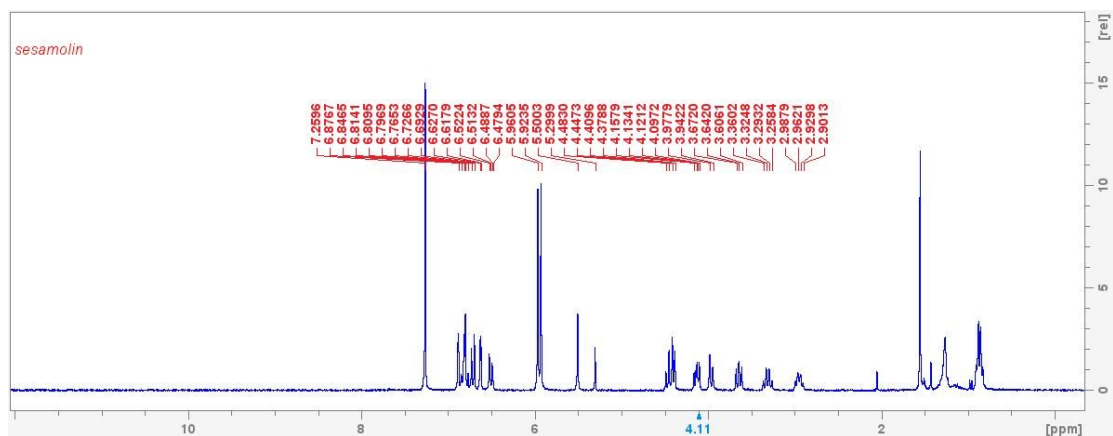

**Figure S11 :**  $^1\text{H}$ - NMR spectrum of sesamolin.

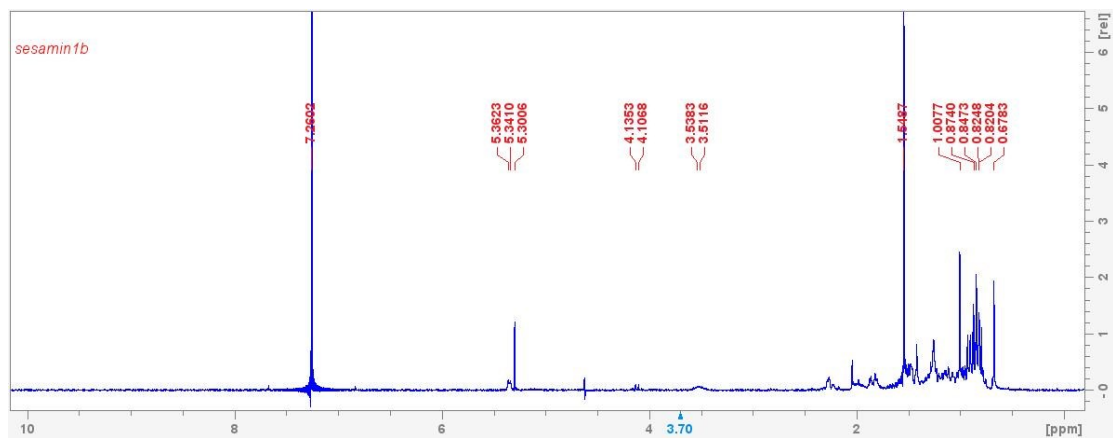

**Figure S12 :**  $^1\text{H}$ - NMR spectrum of sesamin.
